# Supplementary material for: Nogo receptor-Fc delivered by haematopoietic cells enhances neurorepair in a multiple sclerosis model
Source: PubMed Central journal article supplement (PMC10116608; doi:10.1093/braincomms/fcad108), 2023-04-04
Supplement: fcad108_supplementary_data.pdf [file fcad108_supplementary_data.pdf]

## Supplementary Methodology

### Lentivirus generation via HEK 293T cell transfection

Human embryonic kidney (HEK) 293T cells were used to produce functional lentiviral vectors from packaging plasmids and either pLVX-EF1 $\alpha$ -IRES-ZsGreen1 (from here referred to as empty vector) or pLVX-EF1 $\alpha$ -IRES-ZsGreen1-NgR(310)ecto-myc-Fc (from here referred to as NgR(310)ecto-myc-Fc/ NgR(310)ecto-Fc) plasmids. A day prior to transfection, HEK 293T cells were seeded into 10 cm tissue culture dishes with  $5 \times 10^6$  cells per dish in 10 mL antibiotic-free HEK 293T complete medium (10% tetracycline-free FBS, 1% L-glutamine in DMEM). Two hours prior to transfection, the medium was aspirated and replaced with 6 mL fresh antibiotic-free HEK 293T complete medium. The transfection reaction for each dish was prepared with 3.2  $\mu$ g psPAX2 (Addgene #12260), 0.4  $\mu$ g pMD2.G (Addgene #12259), 3.2  $\mu$ g empty plasmid or NgR(310)ecto-myc-Fc plasmid in 40  $\mu$ L dH<sub>2</sub>O with 160  $\mu$ L DMEM (Life technologies) and 24  $\mu$ L FuGene-HD transfection reagent (Promega), gently mixed and incubated for 30 minutes at room temperature. The transfection reaction was then added dropwise to evenly cover the HEK 293T cells which were subsequently incubated at 37 °C for 72 hours to allow for empty and NgR(310)ecto-Fc vector production. The empty or NgR(310)ecto-Fc vector-containing supernatant was then collected and filtered through a 0.45  $\mu$ m filter prior to concentration. Lentiviral vector containing transfection supernatant was concentrated by ultracentrifugation. The supernatant was added to V-bottom canonical tubes (Beckman Coulter) and centrifuged in a Beckman Coulter Optima L-80 floor centrifuge with SW-28 rotor at 20,000 rpm for 140 minutes at 16 °C. The supernatant was then discarded, and the lentiviral vector pellet was resuspended in 50  $\mu$ L DPBS (Life technologies) with 0.5% w/v bovine serum albumin (BSA; Sigma-Aldrich) and allowed to incubate for 30 minutes on ice. The samples were then resuspended again and pooled for storage at -80 °C.

### **Quantification of vectors via HeLa transduction**

To ascertain the quantity of functional lentiviral vectors produced, a virus titration was performed in Henrietta Lacks (HeLa) cells. A day prior to transduction, HeLa cells were seeded at  $1 \times 10^5$  cells per well, in 6 well plates with DMEM complete medium (10% FBS, 1% Pen/Strep, 1% L-glutamine, Life technologies). Spin infection (90 minutes, 32 °C, 1200 xg) was performed in a 2 mL per well volume with serial lentiviral vector dilutions, where  $5.0 \times 10^{-3}$ ,  $5.0 \times 10^{-4}$ ,  $5.0 \times 10^{-5}$ ,  $5.0 \times 10^{-6}$ , and  $5.0 \times 10^{-7}$  mL of empty vector or, of NgR(310)ecto-Fc vector was added, along with 8 µg/mL polybrene (Sigma-Aldrich). Post-spin infection, cells were incubated for 24 hours before replacement of medium and further incubation. After 72 hours post transduction, cells were analyzed for construct expression by flow cytometry.

Virus titer was calculated as

$$\frac{\text{Number of cells at seeding} \times \% \text{ of ZsGreen+ cells}}{\text{volume of virus } (\mu\text{L})} = \text{Virus titer}/\mu\text{L}.$$

### **Flow cytometry**

The animals that reached clinical score 3 were euthanized by CO<sub>2</sub> inhalation and perfused with 1x MT-PBS, then peripheral blood, inguinal lymph nodes, and spleen were collected and prepared as follows for flow cytometric analysis. Briefly, red blood cell (RBC) lysis was performed by addition of 1 mL pre-warmed RBC lysis buffer and incubating for 2 minutes at room temperature. The lysis was then quenched with 5 mL fluorescence activated cell sorting (FACS) buffer and centrifuged for 5 minutes at 1500 rpm, then resuspended in FACS buffer. The cell suspensions were centrifuged and resuspended in cold wash buffer before being aliquoted into 5 mL flow cytometry tubes. Cells were incubated with primary antibodies (Supplementary Table 2) for 30 minutes on ice, then washed with 1 mL of wash buffer and centrifuging for 5 minutes. These samples were analyzed by flow cytometry to determine

chimerism by passage through a LSR II (BD Biosciences), using FACS Diva Software (BD Biosciences) for acquisition and FlowLogic version 700.1A. for post-analysis.

### **Sandwich ELISA**

In order to detect the secreted NgR(310)ecto-Fc fusion protein in vivo post-transplantation, the anti-myc antibody (Cell signaling technologies) was used as a capture antibody and anti-NgR antibody (R&D systems) served as the detection antibody. A 96-well plate was coated with an anti-myc antibody at a concentration of 1 µg/mL in carbonate/bicarbonate buffer (pH 9.6) and incubated overnight at 4 °C. The plate was washed twice with PBS, followed by blocking the remaining protein-binding sites in the coated wells using blocking buffer (5% w/v BSA in PBS) overnight at 4 °C. Each sample was run in triplicates to ensure accuracy. 1 µg of full-length NgR-Fc peptide served as a positive control. The samples were diluted in the final volume of 100 µL and then incubated for 90 minutes at 37 °C. Subsequently, the plate was incubated with detection antibody for 2 hours at room temperature. The plate was washed four times with PBS. The secondary antibody (anti-goat HRP-conjugated, Supplementary Table 2) was diluted in blocking buffer and incubated for 2 hours, at room temperature, followed by four washes with PBS. The substrate solution, ABTS, was added to each well and the plate was read at 416 nm on the Thermo Multiskan microplate reader.

### **Fluorescence in situ hybridization (FISH)**

OCT-embedded tissue sections were prepared the same as immunohistochemistry. The slides were pre-treated with 2.5% pepsin solution (80 mg/ mL) in 0.01N HCL for 30 minutes, then rinsed in 70% ethanol for 30 seconds and air-dried to achieve digestion. Subsequently, slides were dehydrated through an ethanol gradient (70%, 85%, and 100% for 2 minutes each). The slides were immersed in a denaturation buffer to separate DNA strands and incubated at 73 °C

for 5 minutes. The slides were washed with ethanol gradient (70%, 85%, and 100% for 2 minutes each) and placed on a slide warmer at 45 °C until dry. 10 µL of DNA probe mixture (2 µL DNA probe + 8 µL hybridization buffer; Empire Genomics) was prepared per slide (and pre-warmed at 73 °C for 5 minutes. The probe mixture was placed on ice for 2 minutes then incubated at 37 °C for 15 minutes). The slides were incubated overnight with DNA probe mixture in a humidified chamber with humidity control (50% formamide, 2 x SSC) at 37 °C. The slides were washed with pre-warmed wash solution 1 (0.3% v/v igepal, 0.4 x SSC in deionized water) at room temperature for 2 minutes, followed by rinsing with wash solution twice (0.1% v/v igepal, 2 x SSC in deionized water) at room temperature for 1 minute. The samples were stained with DAPI and mounted with anti-fade mounting medium (Life technologies).

### **Spectral confocal microscopy of reflectance imaging (SCoRe)**

The visualisation of reflectance of myelinated axons and myelin debris can be acquired by Nikon A1R confocal microscopy, revealing the multipronged information of myelin structure and compaction. 40 µm thick slices of longitudinal spinal cord section directly mounted by fluorescent mounting medium were scanned using spectral confocal microscopy of reflectance (ScoRe) imaging. Only one laser beam was allowed to provide reflectance illumination of myelin. The first dichroic mirror was altered to the transmitted reflectance mirror BS20/80. All light path detectors were set up to “through”.

## Supplementary Tables

Supplementary Table 1. Incidence table of survival in MOG<sub>35-55</sub> induced EAE disease in animals

|                                                | <b>EAE control</b> | <b>Mock<br/>HSCT EAE control</b> | <b>Empty vector HSCT<br/>EAE</b> | <b>NgR(310)ecto-Fc<br/>HSCT EAE</b> |
|------------------------------------------------|--------------------|----------------------------------|----------------------------------|-------------------------------------|
| <b>Survival post-transplantation</b>           | 26/26 (100%)       | 13/17 (76.5%)                    | 18/26 (61.54%)                   | 21/27(77.78%)                       |
| <b>Mortality post-transplantation</b>          | 0                  | 4                                | 7                                | 6                                   |
| <b>Sudden death post-transplantation</b>       | 0                  | 0                                | 0                                | 0                                   |
| <b>EAE incidence</b>                           | 25/26              | 9/13                             | 10/18                            | 13/21                               |
| <b>Mean day of onset of diseased mice only</b> | 14.60 ± 0.42       | 12.78 ± 0.36                     | 16.10 ± 0.53                     | 15.69 ± 0.61                        |
| <b>Maximum score</b>                           | 3                  | 3                                | 3                                | 3                                   |
| <b>Median score</b>                            | 1.74               | 2.75                             | 1.83                             | 0.7                                 |

**Supplementary Table 2. Key reagents and resources**

| Immunohistochemistry                   |                   |             |                 |                                  |            |             |                 |
|----------------------------------------|-------------------|-------------|-----------------|----------------------------------|------------|-------------|-----------------|
| Primary antibody                       | Vendor            | Catalogue # | Dilution factor | Secondary antibody               | Vendor     | Catalogue # | Dilution factor |
| Rat anti-CD11b                         | BD biosciences    | 553308      | 1:200           | Goat anti-rat Alexa Fluor 647    | Invitrogen | A-21247     | 1:500           |
| Rabbit anti-myc                        | CST               | 2278        | 1:200           | Goat anti-rabbit Alexa Fluor 555 | Invitrogen | A-21428     | 1:500           |
| Mouse anti-myc (9B11)                  | Cell signalling   | 2276S       | 1:100           | Goat anti-mouse Alexa Fluor 647  | Invitrogen | A-21236     | 1:200           |
| Rabbit anti-NogoA                      | Millipore         | AB5888      | 1:200           | Goat anti-rabbit Alexa Fluor 555 | Invitrogen | A-21428     | 1:200           |
| Rabbit anti-degraded MBP               | Millipore         | AB5864      | 1:2000          | Goat anti-rabbit Alexa Fluor 555 | Invitrogen | A-21428     | 1:2000          |
| Mouse anti-MRP14                       | Sigma Aldrich     | MABF276     | 1:200           | Goat anti-mouse Alexa Fluor 647  | Invitrogen | A-21236     | 1:200           |
| Rat anti-CD206                         | Biolegend         | 141701      | 1:200           | Goat anti-rat Alexa Fluor 555    | Invitrogen | A-21434     | 1:200           |
| Alexa Fluor 555-conjugated Fluromyelin | Life technologies | F34652      | 1:100           |                                  | N/A        |             |                 |
| Mouse anti- $\beta$ APP                | Thermo fisher     | MA125489    | 1:200           | Goat anti-mouse Alexa Fluor 647  | Invitrogen | A-21236     | 1:500           |

|                                              |                      |            |        |                                     |            |         |       |
|----------------------------------------------|----------------------|------------|--------|-------------------------------------|------------|---------|-------|
| Rabbit anti-GAP43                            | Abcam                | ab75810    | 1:1000 | Goat anti-rabbit<br>Alexa Fluor 647 | Invitrogen | A-32733 | 1:500 |
| Mouse anti-BCAS1                             | Santa Cruz           | sc-393808  | 1:200  | Goat anti-mouse<br>Alexa Fluor 555  | Invitrogen | A-21236 | 1:500 |
| Goat anti-Sox10                              | R&D systems          | AF2864     | 1:200  | Donkey anti-goat<br>Alexa Fluor 647 | Invitrogen | A-32849 | 1:500 |
| Rat<br>PE-conjugated<br>anti-cKit            | eBioscience          | 12117182   | 1:200  |                                     | N/A        |         |       |
| Rat anti-CD19                                | Biolegend            | 115552     | 1:200  | Goat anti-rat Alexa<br>Fluor 555    | Invitrogen | A-21434 | 1:200 |
| Hamster PerCP-Cy5.5-<br>conjugated anti-CD3e | BD bioscience        | 551163     | 1:200  |                                     | N/A        |         |       |
| Rabbit anti-Iba1                             | Novus<br>Biologicals | NBP2-16908 | 1:200  | Goat anti-rabbit<br>Alexa Fluor 555 | Invitrogen | A-21428 | 1:500 |
| Rabbit anti-TREM2                            | Thermo fisher        | PA5-87933  | 1:100  | Goat anti-rabbit<br>Alexa Fluor 555 | Invitrogen | A-21428 | 1:200 |
| Alexa Fluor 647-<br>conjugated anti-GFAP     | BD bioscience        | 560298     | 1:50   |                                     | N/A        |         |       |
| Rabbit anti-C3                               | Biorbyt              | Orb453141  | 1:200  | Goat anti-rabbit<br>Alexa Fluor 555 | Invitrogen | A-21428 | 1:200 |
| Rabbit anti-S100A10                          | Thermo fisher        | PA5-95505  | 1:500  | Goat anti-rabbit<br>Alexa Fluor 555 | Invitrogen | A-21428 | 1:500 |

|  |  |  |  |      |                  |       |        |
|--|--|--|--|------|------------------|-------|--------|
|  |  |  |  | DAPI | Thermo<br>fisher | 62248 | 1:1000 |
|--|--|--|--|------|------------------|-------|--------|

**Immunopanning / Immunoprecipitation / Western blot**

| <b>Primary antibody</b>                  | <b>Vendor</b>     | <b>Catalogue #</b> | <b>Dilution/<br/>Concentration</b> | <b>Secondary antibody</b>          | <b>Vendor</b>          | <b>Catalogue #</b> | <b>Dilution<br/>factor</b> |
|------------------------------------------|-------------------|--------------------|------------------------------------|------------------------------------|------------------------|--------------------|----------------------------|
| Goat anti-rabbit IgG<br>(H+L)            | Life technologies | 81-1620            | 10mg/ml                            | Rabbit anti-mouse<br>CD11b         | Sapphire<br>Bioscience | NB110-<br>89474    | 1:10                       |
| Mouse anti-myc                           | Millipore         | 05724              | 1:100                              |                                    | N/A                    |                    |                            |
| Rabbit anti-Nogo66                       | Millipore         | AB5888             | 1:1000                             | HRP-conjugated<br>Goat anti-Rabbit | Sigma<br>Aldrich       | 401353             | 1:2000                     |
| Rabbit anti-MAG                          | Cell signalling   | 12275              | 1:1000                             | HRP-conjugated<br>Goat anti-Rabbit | Sigma<br>Aldrich       | 401353             | 1:2000                     |
| Rat anti-mNgR1                           | R&D systems       | MAB1659            | 1:1000                             | HRP-conjugated<br>Goat anti-Rat    | Invitrogen             | 31470              | 1:2000                     |
| Goat HRP-conjugated<br>anti-mouse IgG-Fc | Abcam             | Ab97265            | 1:1000                             |                                    | N/A                    |                    |                            |
| Mouse anti- $\alpha$ tubulin             | Millipore         | MAB1637            | 1:1000                             | HRP-conjugated<br>Goat anti-Mouse  | Invitrogen             | 31430              | 1:2000                     |
| Mouse anti- $\beta$ actin                | Thermo fisher     | 26634              | 1:1000                             | HRP-conjugated<br>Goat anti-Mouse  | Invitrogen             | 31430              | 1:2000                     |

**Flow cytometry**



| <b>Primary antibody</b>                 | <b>Vendor</b>  | <b>Catalogue #</b> | <b>Dilution factor</b> |
|-----------------------------------------|----------------|--------------------|------------------------|
| Rat PE-conjugated anti-B220             | BD biosciences | 553090             | 1:200                  |
| Hamster APC-conjugated anti-CD11c       | BD biosciences | 550261             | 1:50                   |
| Hamster PerCP-Cy5.5-conjuated-anti-CD3e | BD biosciences | 551163             | 1:50                   |
| Rat biotinylated-anti-CD11b             | BD biosciences | 557395             | 1:50                   |
| Rat PE-Cy7-conjugated anti-Sca-1        | eBioscience    | 25598181           | 1:400                  |
| Streptavidin-APC                        | eBioscience    | 17431782           | 1:300                  |

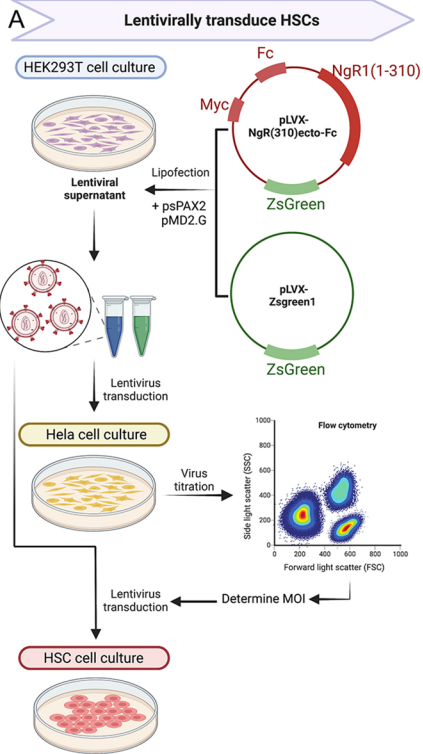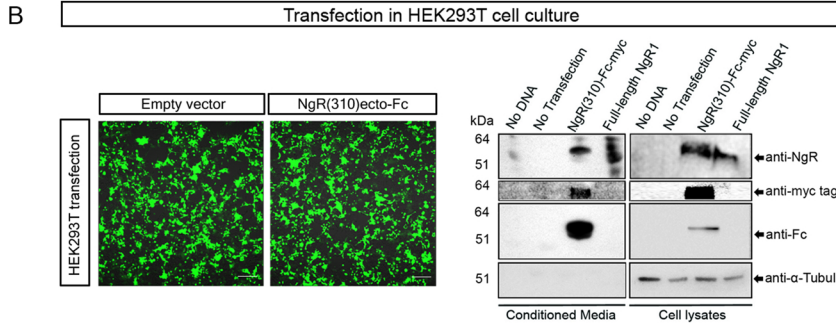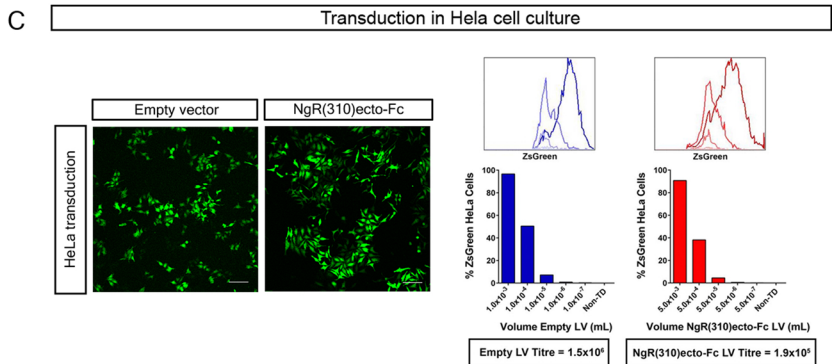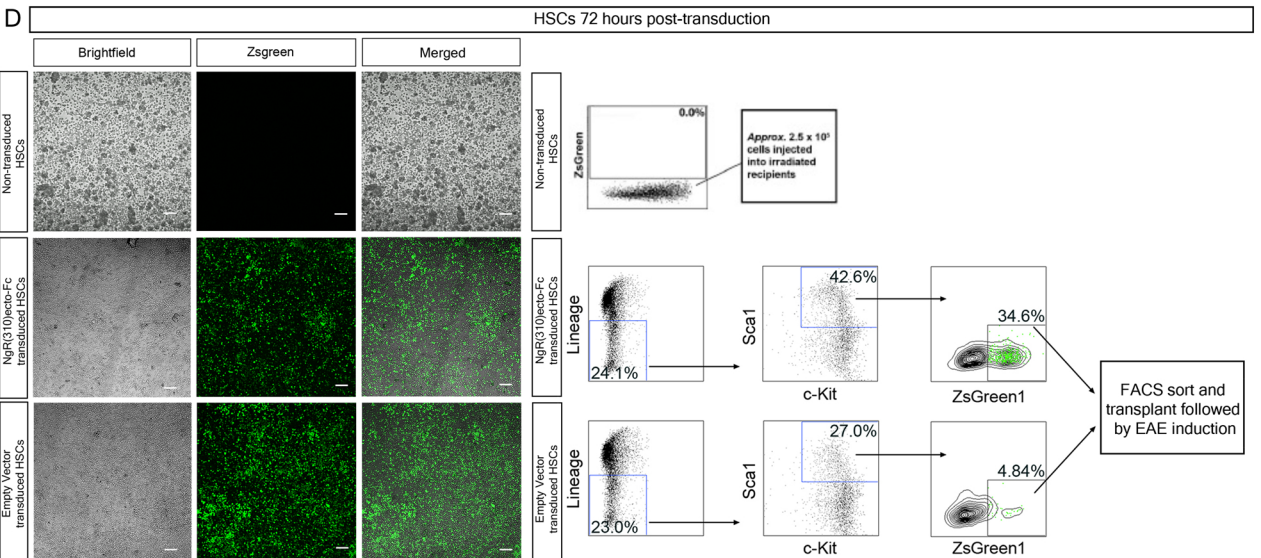

## Supplementary Figure 1

### Successful transfection and transduction of lentivirus carrying NgR(310)ecto-Fc fusion protein.

(A) Schematic workflow diagram performed to achieve lentiviral transduction in HSCs. (B) Lentiviral envelope and packaging plasmids in conjunction with transfer plasmids carrying either ZsGreen alone or NgR(310)ecto-Fc fusion protein and ZsGreen was used to generate lentivirus in HEK 293T cells following lipofection. Scale bar = 100  $\mu\text{m}$ . Pre-immunoprecipitation data with 5% input of protein from in vitro conditioned media and cell lysates from the transfected 293T HEK cells, followed by immunoprobings all western blot transfer membranes with anti-NgR, anti-myc tag, anti-Fc and anti-  $\alpha$ -tubulin antibodies. (C) Both packaging lentivirus carrying ZsGreen alone (empty vector) and NgR(310)ecto-Fc fusion protein was titrated through the transduction of HeLa cells. Transduction was conducted following a serial dilution range of different viral titres. Scale bar = 100  $\mu\text{m}$ . 72 h post-transduction, the percentage of HeLa cells as ZsGreen-positive were determined by flow cytometry. (D) 72h post-transduction, empty vector and lentivirus carrying NgR(310)ecto-Fc was successfully transduced into lineage-depleted HSCs isolated from male C57Bl6 donor mice at multiplicity of infection of 50. Scale bar = 100  $\mu\text{m}$ . The expression of c-Kit, Scal and ZsGreen of lineage-negative enriched cells was determined as the percentage of these markers from the total cells identified through flow cytometry.

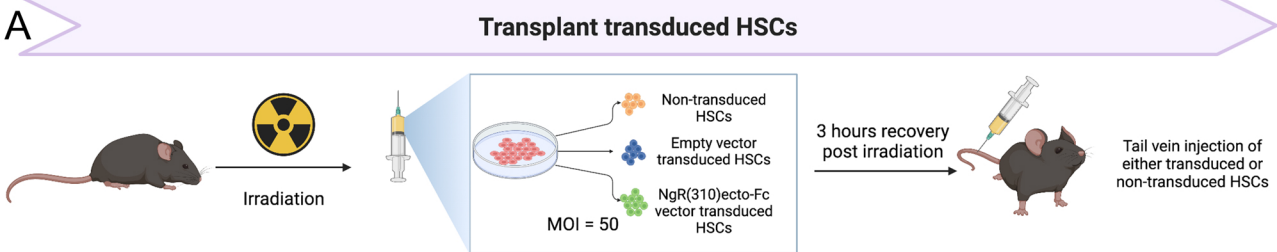

### Transduced HSC cell culture (pre-transplant) + Sera analysis (post-transplantation)

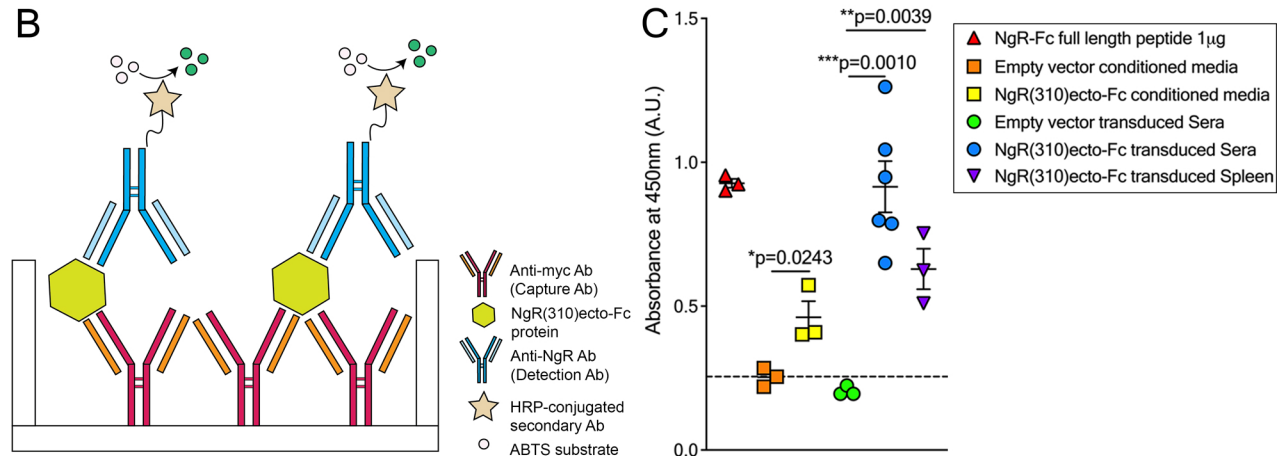

### Lentivirally transduced cells localised in Spleen (post-transplantation)

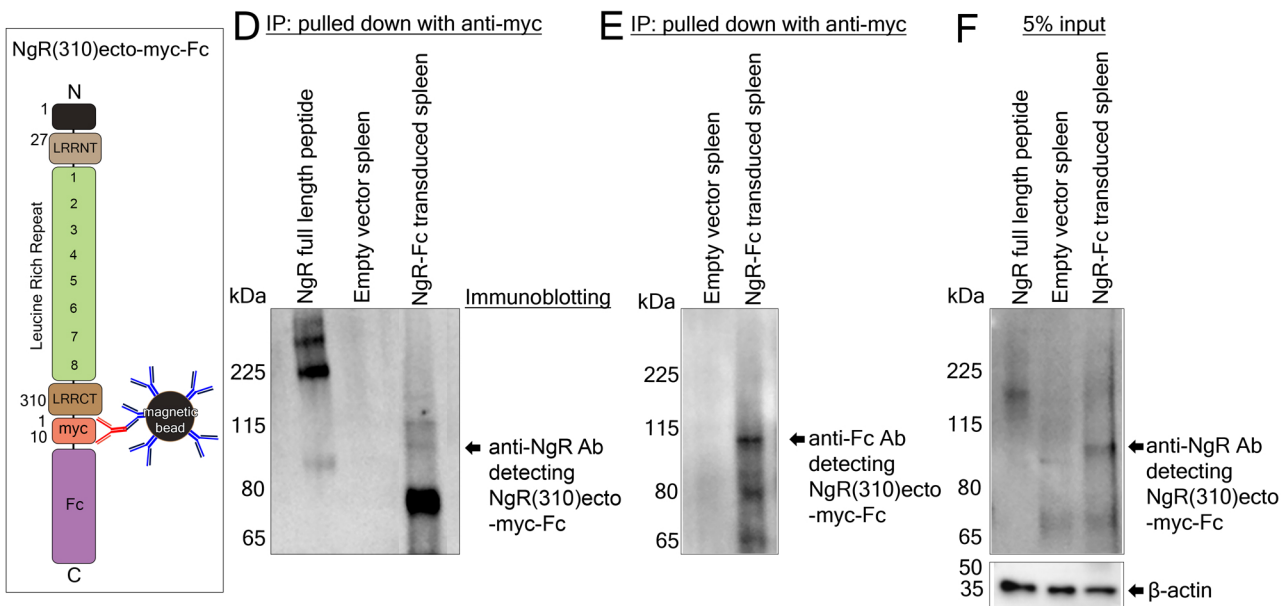

## Supplementary Figure 2

### Secretion of NgR(310)ecto-Fc fusion protein in the periphery and secondary lymphoid organs.

(A) Schematic diagram of non-transduced empty vector-transduced and NgR(310)ecto-Fc-transduced HSCs that are transplanted into irradiated female recipient mice via tail vein injection after 3-hour post-irradiation recovery. (B) Schematic diagram of sandwich-ELISA to capture with anti-myc antibody and detect the secretion of NgR(310)ecto-Fc fusion protein in conditioned media, sera and spleen collected from the empty vector and NgR(310)ecto-Fc HSCT animals with primary anti-NgR antibody. (C) ELISA determined concentration of NgR(310)ecto-Fc fusion protein in NgR-Fc full length peptide solution (red), empty vector conditioned media (orange), NgR(310)ecto-Fc conditioned media (yellow), empty vector transduced sera (green), NgR(310)ecto-Fc transduced sera (blue) and spleen (purple). One-way ANOVA with Tukey post-hoc test.  $*P < 0.05$ ,  $**P < 0.01$ ,  $***P < 0.001$ . Individual data points plotted on the graph represent either pooled media samples obtained from individual experiments following ex vivo HSC transduction, or sera samples and spleen tissue lysates that were collected from individual mice following transplantation of transduced HSCs. (D-E) Immunoprecipitation of myc-tagged proteins of the spleen lysates from the empty vector and NgR(310)ecto-Fc HSCT animals, followed by immunoprobings the membranes with (D) anti-NgR, and (E) anti-Fc antibodies. (F) Pre-immunoprecipitation data with 5% input of protein from the spleen lysates collected from the empty- and NgR(310)ecto-Fc-transduced animals, followed by immunoprobings the membranes with anti-NgR and anti-actin antibodies.

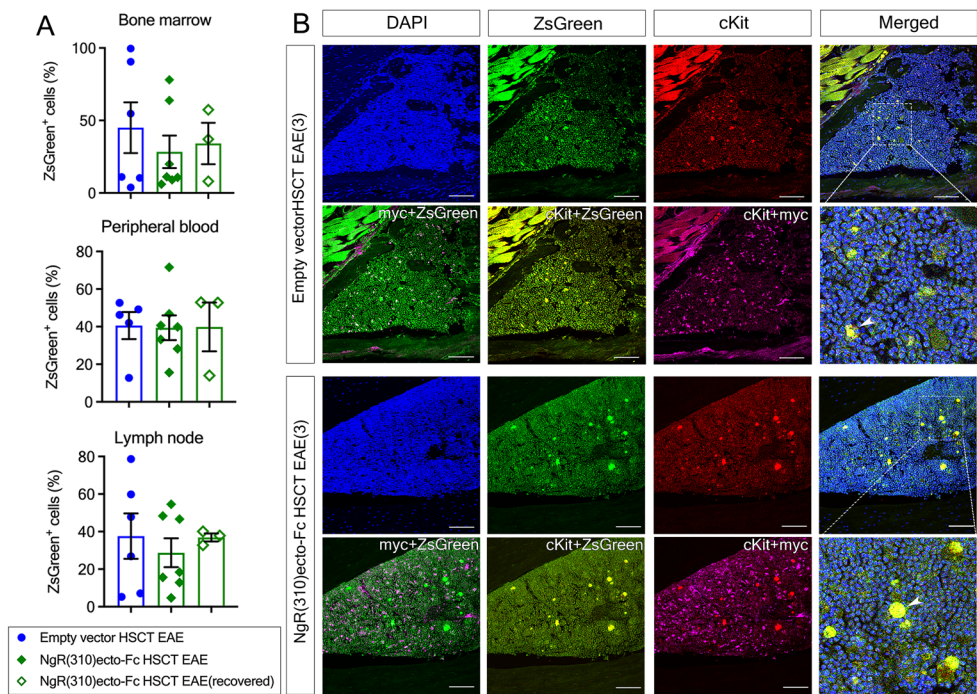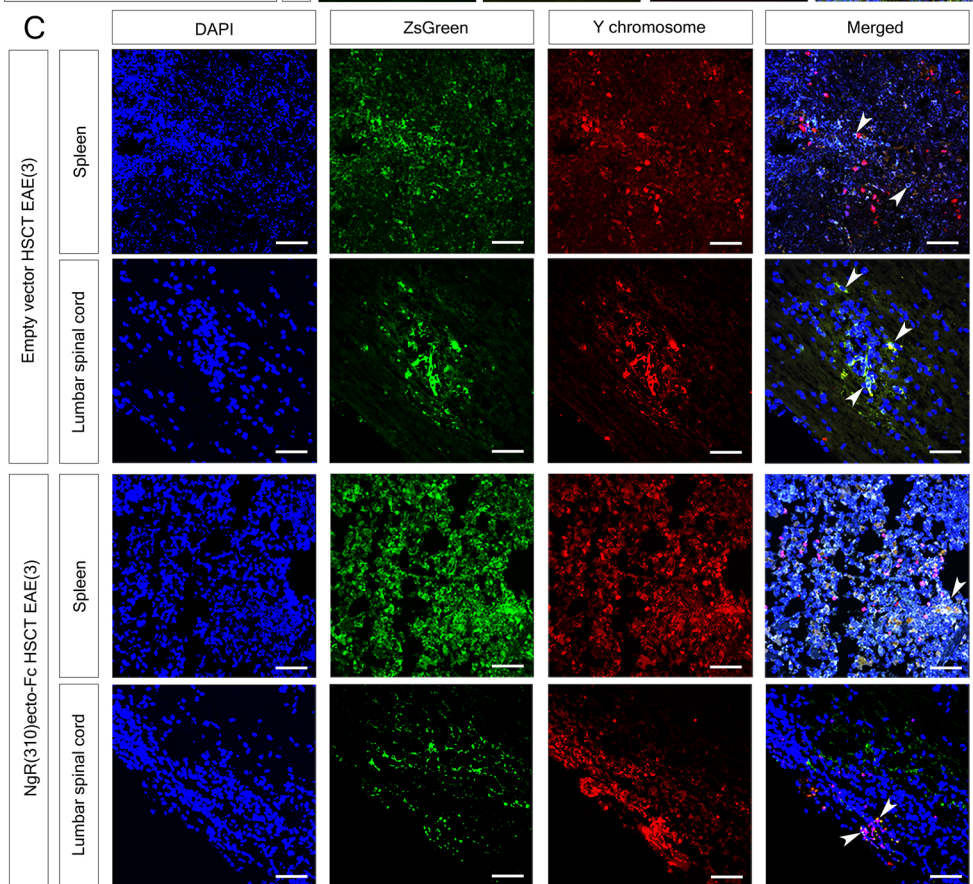

### Supplementary Figure 3

#### **ZsGreen expression in peripheral tissues at the peak of disease in lentiviral vector transduced HSC recipient mice.**

(A) ZsGreen expression was detected in bone marrow, peripheral blood and lymph nodes at the peak stage of disease by flow cytometry. No statistical significant differences were recorded among the groups of empty vector- and NgR(310)ecto-Fc-transduced HSCT at the peak EAE and recovered animals.  $n = 3-7$  per group. Data are represented as mean  $\pm$  SEM. One-way ANOVA with Tukey post-hoc test. Individual data points represent the analysis of the percentage of ZsGreen<sup>+</sup> cells isolated from experimental mice and analysed by flow cytometry.

(B) Immunohistochemical analysis of ZsGreen (green), cKit (red), and myc (magenta) in bone marrow sections of the empty vector and NgR(310)ecto-Fc HSCT mice at EAE clinical score 3. Lower panel showed the presence of two channels being merged as myc + ZsGreen, cKit + ZsGreen, and cKit + myc. Scale bar = 100  $\mu$ m. (C) Fluorescence in situ hybridization analysis was performed using a Y-chromosome-specific DNA probe to identify male donor HSCs in the spleen and lumbar spinal cords from lentivirally transduced HSC recipient mice by co-localized expression of ZsGreen (green) and Y-chromosome (red) indicated by white arrowheads. Scale bar = 50  $\mu$ m.

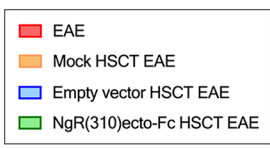

**B** Peripheral blood at EAE score 3

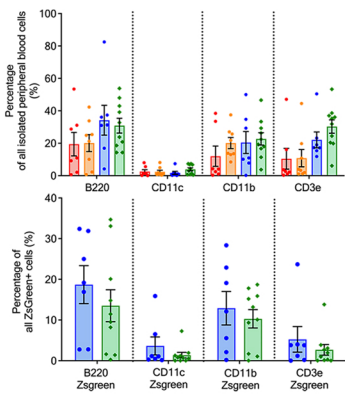

**C** Lymph node at EAE score 3

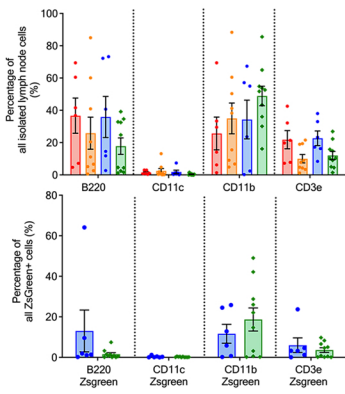

**A** Peripheral blood prior to EAE

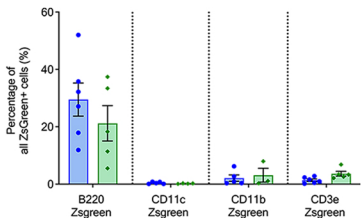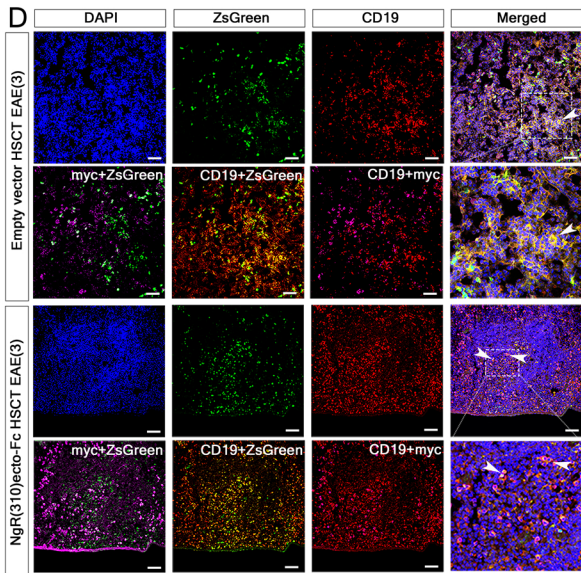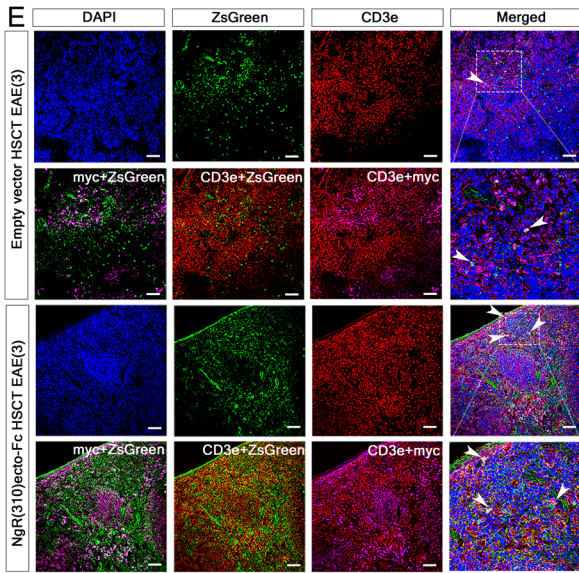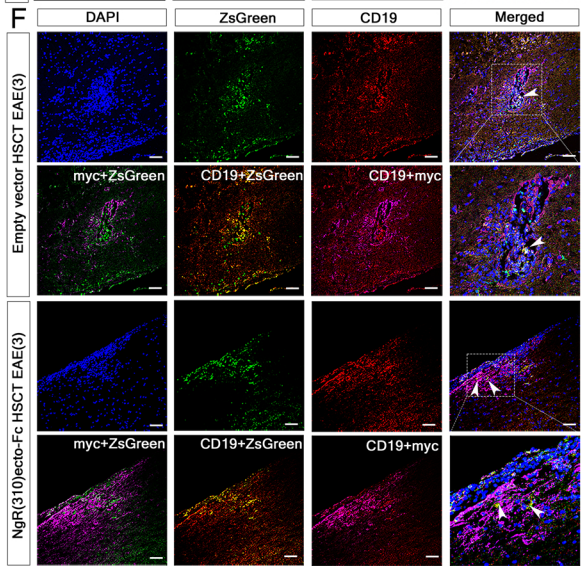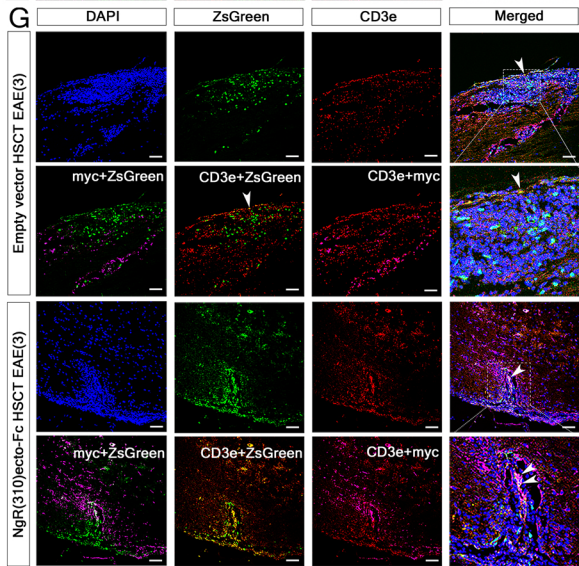



#### Supplementary Figure 4

##### **No significant immunomodulation after lentivirus-transduced HSC transplantation on mature immune cell lineage differentiation.**

(A-C) Flow cytometric immunophenotyping of the cells. (A) Prior to EAE induction, the percentage of ZsGreen<sup>+</sup> cells co-expressing either of the B220, CD11c, CD11b, or CD3e surface markers versus the overall percentage of isolated ZsGreen<sup>+</sup> cells from the peripheral blood of empty vector and NgR(310)ecto-Fc HSCT mice were determined. (B-C) At the peak stage of EAE (clinical score 3), the percentage of ZsGreen<sup>+</sup> cells co-expressing either of the B220, CD11c, CD11b, or CD3e surface markers were compared with all lineage cells that were isolated from: the peripheral blood that were ZsGreen<sup>+</sup> (B) and the lymph nodes that were ZsGreen<sup>+</sup> (C); were analysed. The level of ZsGreen<sup>+</sup> lineage-differentiated immune cells in both empty vector and NgR(310)ecto-Fc vector transduced HSCT recipient mice were similar at the peak stage of disease (EAE clinical score 3). All EAE-induced mice analysed were n = 5-10. Data were represented as mean ± SEM with a two-way ANOVA with Tukey post-hoc test applied. Individual data points plotted in the graph represent isolated cells from tissue samples from experimental mice. (D-E) Immunochemical images of CD19<sup>+</sup> B lymphocytes (D) and CD3e<sup>+</sup> T lymphocytes (E) in the spleen. Either CD19 or CD3e (red) labelled with ZsGreen (green) and myc (magenta) was demonstrated as transduced HSCs-derived mature immune cells (indicated by arrowheads). Scale bar = 100 µm. (F-G) Immunochemical images of ZsGreen lineage CD19<sup>+</sup> B (F) and CD3e<sup>+</sup> T (G) immune cells (indicated by arrowhead) at the perivascular area and inflammatory region of spinal cords in the transduced HSCT mice with EAE clinical score 3. Scale bar = 100 µm.

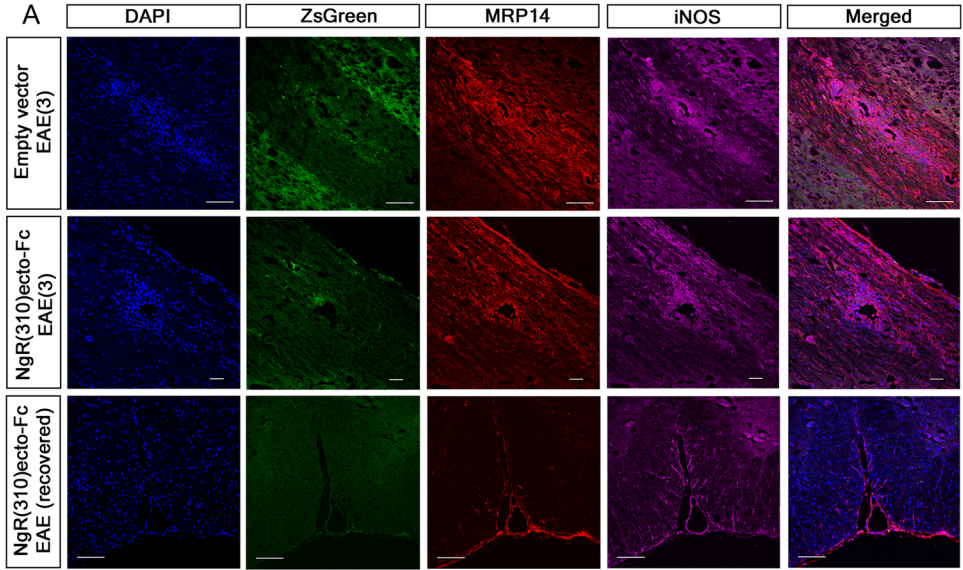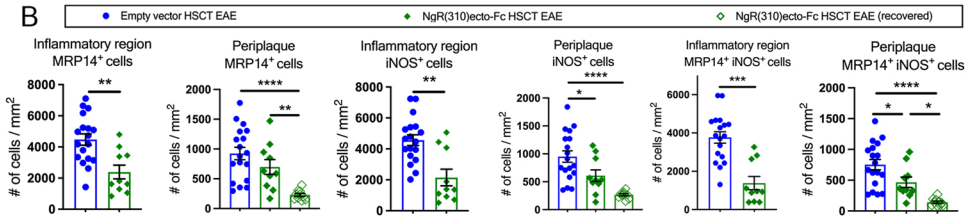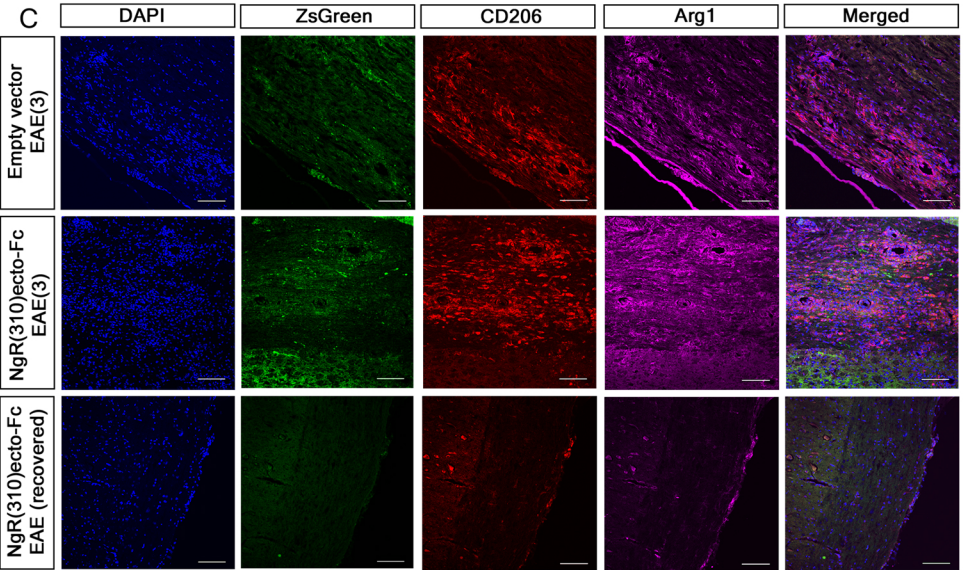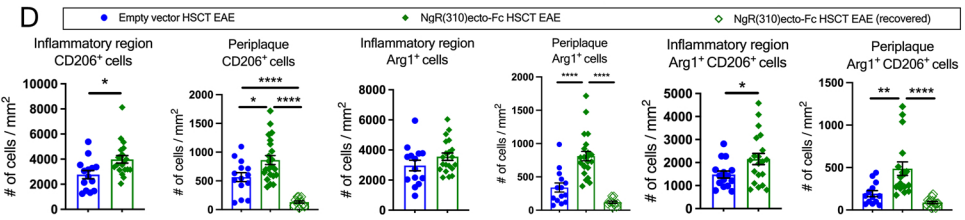

## Supplementary Figure 5

### Phenotyping the endogenous microglia and macrophage populations during EAE progression in empty and NgR(310)ecto-Fc vector administered HSCT mice.

(A) Immunochemical staining of proinflammatory ZsGreen<sup>+</sup> (green) macrophages labelled with MRP14 (red) and iNOS (magenta) within the spinal cord white matter inflammatory lesions identified in empty- and NgR(310)ecto-Fc-transduced HSCT recipient mice that either exhibited an EAE clinical score 3 or were clinically recovered. Scale bar = 100  $\mu$ m. (B) The calculated number of cells per unit area of the inflammatory regions (IR) and peri-plaque white matter (PPWM) areas of spinal cord are demonstrated for MRP14<sup>+</sup> cells, iNOS<sup>+</sup> cells, and MRP14<sup>+</sup>iNOS<sup>+</sup> double labelled cells (n = 3 per group). Data were represented as mean  $\pm$  SEM. Mann-Whitney two-tailed t-test. Unpaired two-tailed t-test, One-way ANOVA with Tukey post-hoc test. \* $P$  < 0.05, \*\* $P$  < 0.01, \*\*\* $P$  < 0.001, \*\*\*\* $P$  < 0.0001. Individual data points represent the cell numbers obtained from inflammatory and non-inflammatory regions of spinal cord (longitudinal sections) of experimental mice. (C) Immunochemical staining of ZsGreen<sup>+</sup> (green) macrophages labelled with CD206 (red) and Arg1 (magenta) in the spinal cord of empty vector, NgR(310)ecto-Fc HSCT recipients at the peak EAE clinical score 3 and recovered NgR(310)ecto-Fc HSCT. Scale bar = 100  $\mu$ m. (D) The calculated number of cells per unit area of the IR and PPWM areas of spinal cord are demonstrated for CD206<sup>+</sup> cells, Arg1<sup>+</sup> cells, and CD206<sup>+</sup>Arg1<sup>+</sup> double labelled cells (n = 3 per group). Data were represented as mean  $\pm$  SEM. Unpaired two-tailed t-test, One-way ANOVA with Tukey post-hoc test. \* $P$  < 0.05, \*\* $P$  < 0.01, \*\*\*\* $P$  < 0.0001. Individual data points represent the cell numbers obtained from inflammatory and non-inflammatory regions of spinal cord (longitudinal sections) of experimental mice.

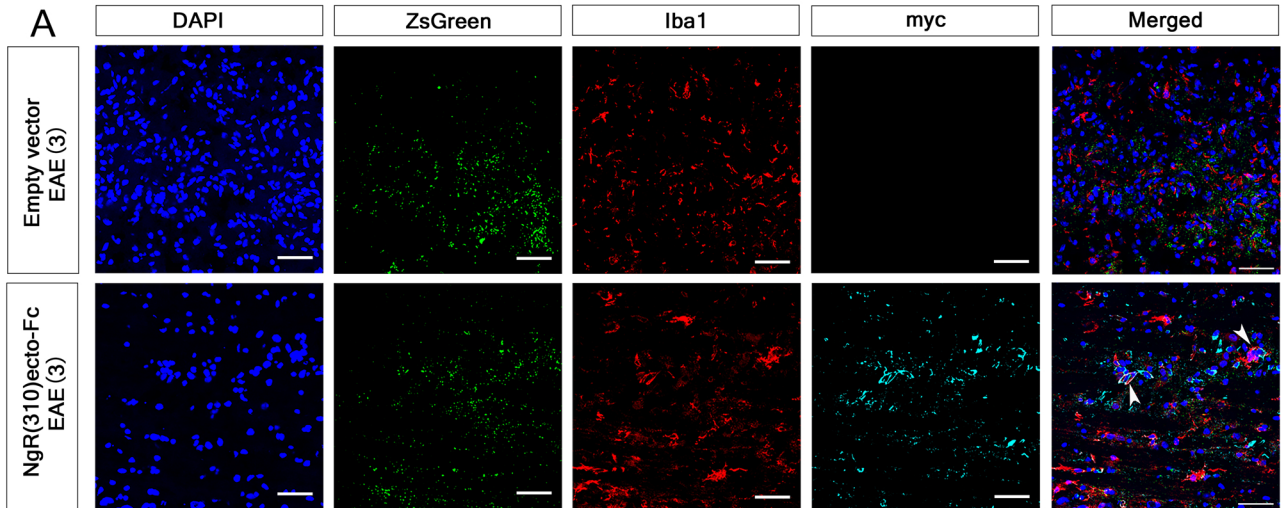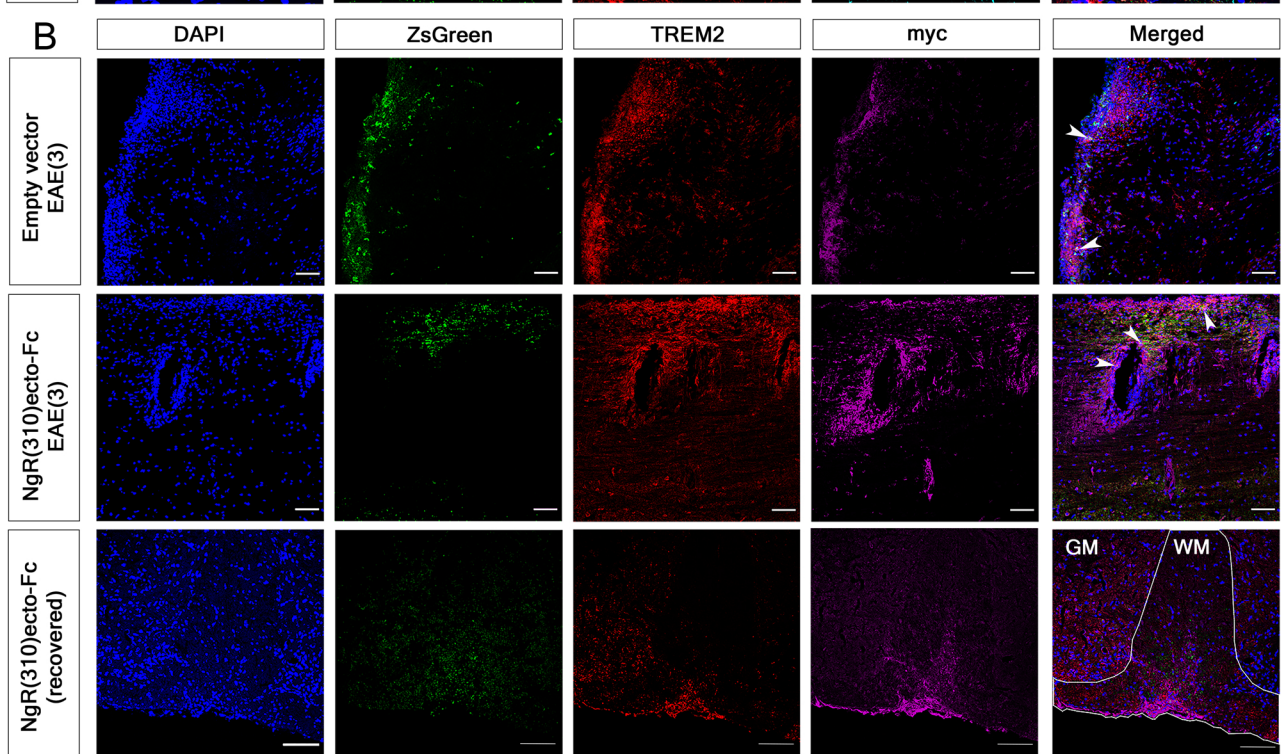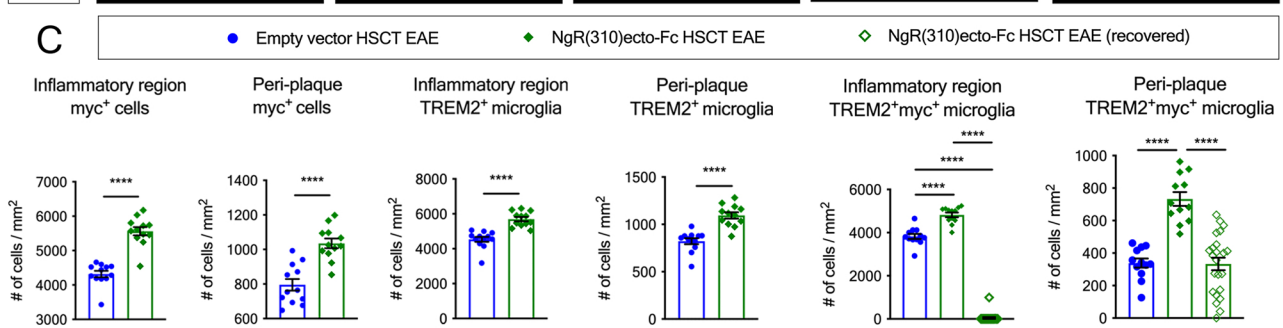

## Supplementary Figure 6

### Phenotyping the endogenous microglia and macrophage populations during EAE progression in empty and NgR(310)ecto-Fc vector administered HSCT mice.

(E) Immunochemical staining of microglia labelled with Iba1 (red) and myc (magenta) within the inflammatory lesion in the spinal cords of the empty vector- and NgR(310)ecto-Fc-transduced HSCT recipient with EAE clinical score 3. Scale bar = 50  $\mu$ m. (F) Immunochemical staining of ZsGreen (green) colocalized with the homeostatic microglia marker TREM2 (red) and myc (magenta) was conducted in the spinal cord of empty vector, NgR(310)ecto-Fc HSCT recipients at the peak EAE clinical score 3 and recovered NgR(310)ecto-Fc HSCT. Scale bar = 100  $\mu$ m. (G) The calculation of myc<sup>+</sup> cells, TREM2<sup>+</sup> microglia and colocalized TREM2<sup>+</sup>myc<sup>+</sup> microglia number per the IR and PPWM area of spinal cords in either the empty or NgR(310)ecto-Fc HSCT recipient mice at the peak stage and clinically recovered NgR(310)ecto-Fc group. TREM2<sup>+</sup>myc<sup>+</sup> microglial cell numbers per IR and PPWM area in mice carrying the NgR(310)ecto-Fc vector at the peak stage of the disease significantly increased when compared with the mice containing the empty vector. n = 3 per group. Data were represented as mean  $\pm$  SEM. Mann-Whitney two-tailed t-test. One-way ANOVA with Tukey post-hoc test. \*\*\*\*P < 0.0001. Individual data points represent the cell numbers obtained from inflammatory and non-inflammatory regions of spinal cord (longitudinal sections) of experimental mice.

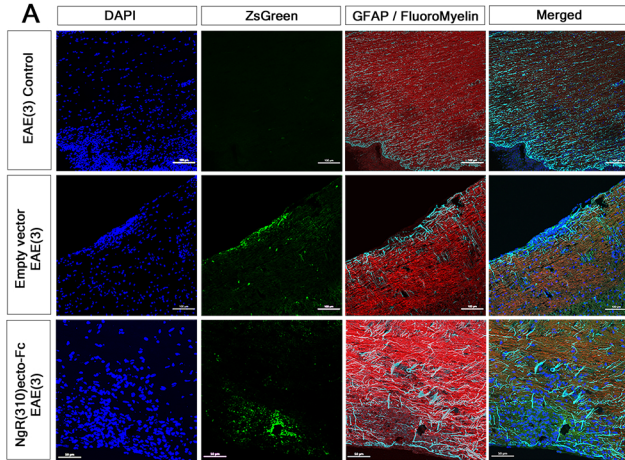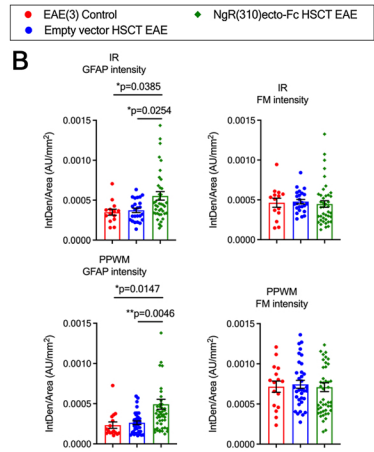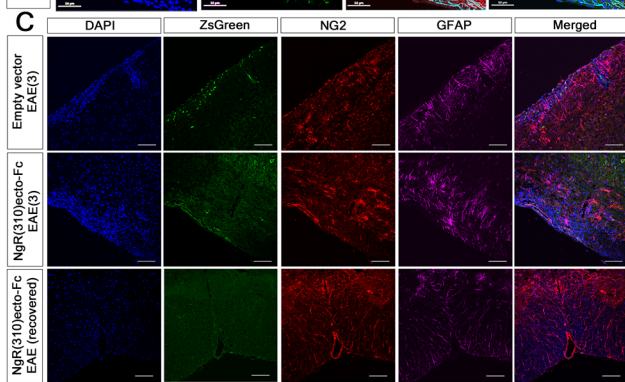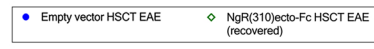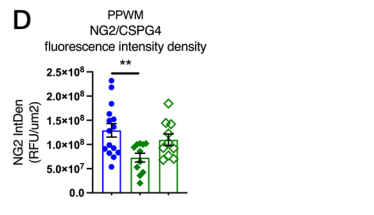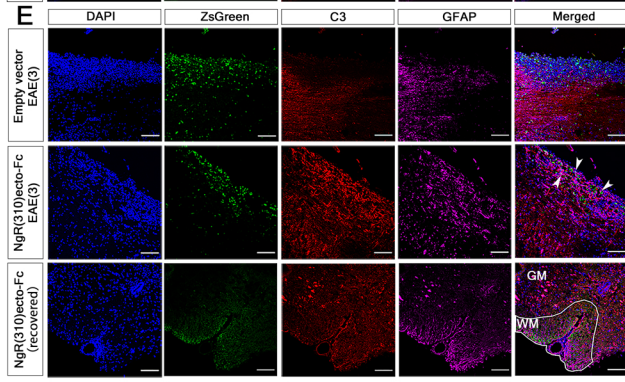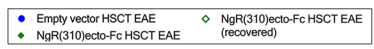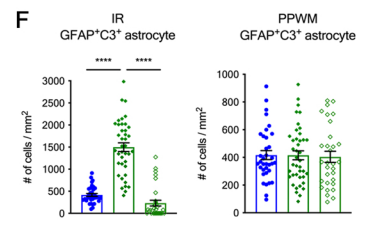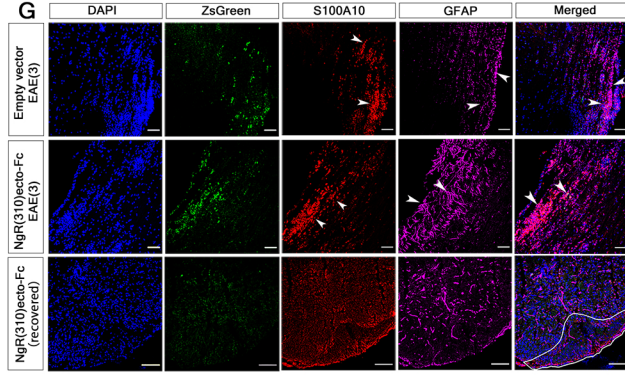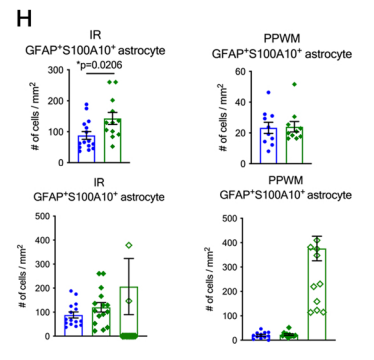

## Supplementary Figure 7

### **Phenotyping the populations of astrocytes and quantifying the expression of CSPG4+ extracellular matrix labelling during EAE progression in empty and NgR(310)ecto-Fc vector-administered HSCT recipient mice.**

(A) Astrocytes were identified by the colocalization of the universal astrocytic cell marker GFAP (cyan) and FluoroMyelin (red). Labelling was identified within the lesioned demyelinated regions of the spinal cord of either the EAE-induced control, empty vector and NgR(310)ecto-Fc HSCT recipient mice at the peak stage of EAE (clinical score 3). (B) The quantification of GFAP+ and FluoroMyelin+ fluorescence intensity per IR and PPWM area was plotted. Elevated numbers of astrocytes within the spinal cords of NgR(310)ecto-Fc HSCT mice are located near demyelinated axons when compared with empty vector HSCT recipient mice. Data were represented as mean  $\pm$  SEM. One-way ANOVA with Tukey post-hoc test.  $*P < 0.05$ ,  $**P < 0.001$ . Individual data points represent the analysis of fluorescence intensity density obtained from the longitudinal spinal cord sections of experimental mice. (C) Astrocytic extracellular deposits were identified by fluorescence labelling of GFAP (magenta) and CSPG4 (red) within the lesional demyelinated regions of the spinal cords of either empty vector and NgR(310)ecto-Fc HSCT recipient at the peak stage of EAE (clinical score 3) or clinically recovered NgR(310)ecto-Fc HSCT recipient mice. (D) The fluorescence intensity density of CSPG4+ labelling per PPWM area was shown in empty vector and NgR(310)ecto-Fc HSCT recipients at the peak stage and recovery stage following EAE. Data were represented as mean  $\pm$  SEM. One-way ANOVA with Tukey post-hoc test.  $**P < 0.001$ . Individual data points represent the analysis of fluorescence intensity density obtained from the longitudinal spinal cord sections of experimental mice. (E-H) Immunohistochemical staining of astrocytes (GFAP) co-expressed with either C3 (red; E) or S100A10 (red; G) determined the respective populations of either the Astrocyte phenotype 1 (A1) or Astrocyte phenotype 2 (A2). The

analysis of A1 (**F**) and A2 (**H**) cell numbers per IR and PPWM area in the empty vector, NgR(310)ecto-Fc HSCT mice at the peak stage of the disease (EAE clinical score 3) and the NgR(310)ecto-Fc HSCT recipient mice at the recovered stage is represented. Reactive astrocytes localised within inflammatory demyelinating lesions represented a phenotypic switch of astrocytes in NgR(310)ecto-Fc HSCT recipient mice following their recover from EAE. Scale bar = 100  $\mu\text{m}$ . n = 3 per group. Data were represented as mean  $\pm$  SEM. Mann-Whitney two-tailed t-test. One-way ANOVA with Tukey post-hoc test. \*\*\*\* $P < 0.0001$ . Individual data points represent the cell numbers obtained from the longitudinal spinal cord sections of experimental mice.



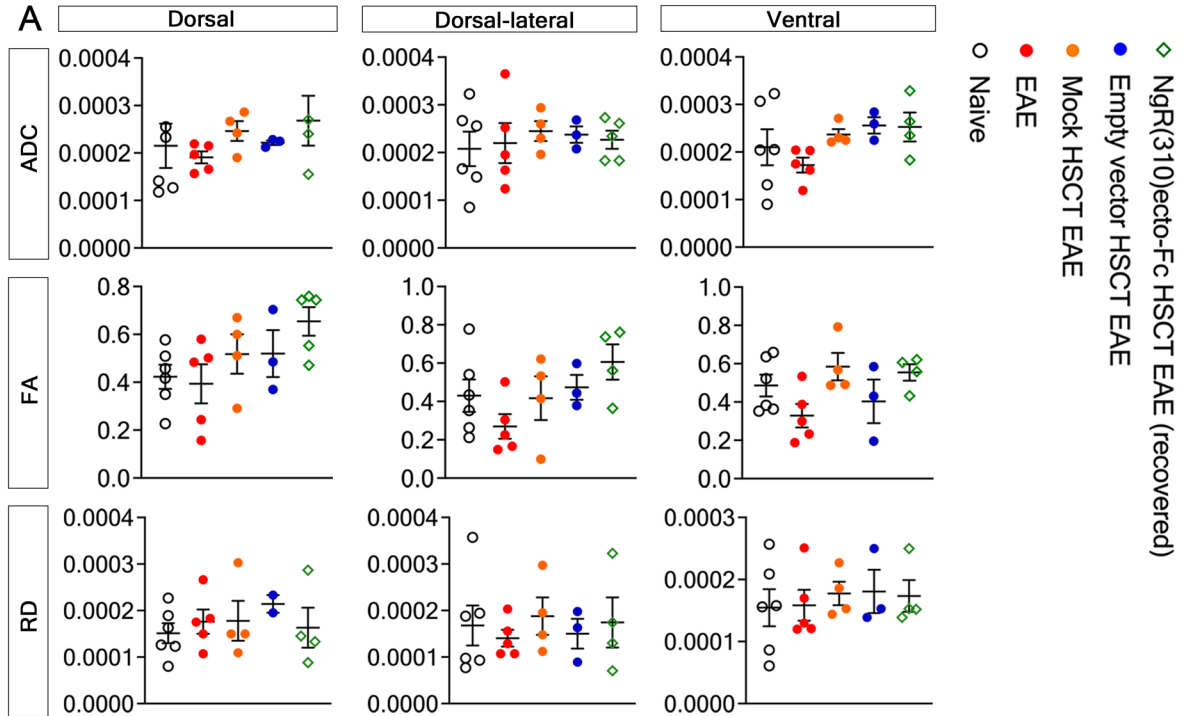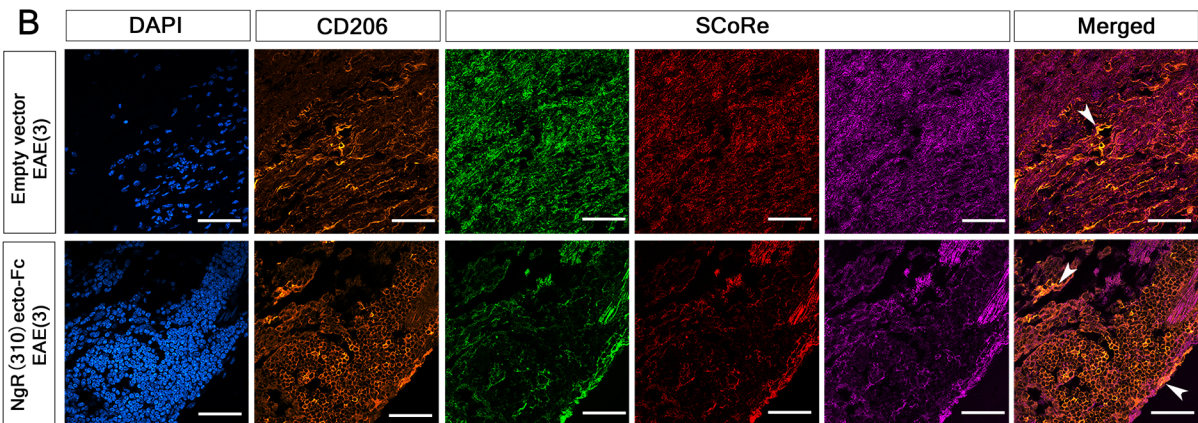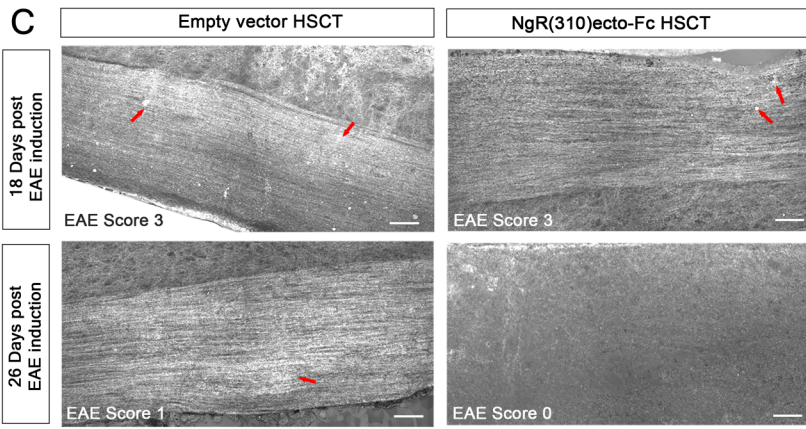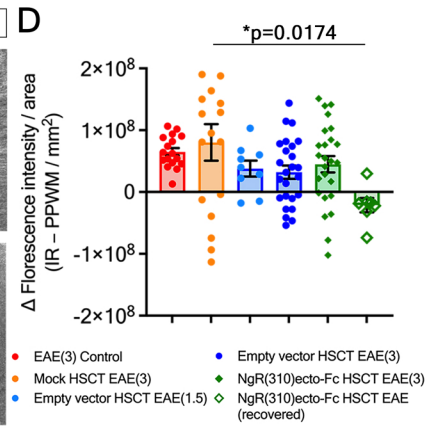

## Supplementary Figure 8

### **Diminished SCoRe of myelin debris observed in the inflammatory region of regenerated spinal cords from mice administered with lentiviral-transduced NgR(310)ecto-Fc vector.**

(A) ADC, FA and RD measurements of dorsal, dorsal-lateral and ventral tract in naïve, EAE control, Mock HSCT EAE, empty vector-transduced and clinically recovered NgR(310)ecto-Fc HSCT mice.  $n = 3-6$ . One-way ANOVA and Tukey post-hoc test.  $*P < 0.05$ ,  $**P < 0.001$ ,  $****P < 0.0001$ . (B) Representative Images of SCoRe with immunostaining of CD206+ (yellow) macrophage engulfing myelin debris (green, red and magenta) in inflammatory region in mice transplanted with NgR(310)-ecto-Fc HSCs (indicated by arrowheads). Scale bar =  $50\mu\text{m}$ . (C) Reflective microscopy indicated compact myelin expression and myelin debris (red arrowheads) in empty vector- and NgR(310)ecto-Fc-overexpressed cords collected from post-transduction Day 18 (the peak stage of EAE; clinical score 3) and Day 26 (the recovered stage of EAE; clinical score 0). These compact myelinated axons present SCoRe as an elongated and continuous pattern of line. However, the inflammatory region involving demyelination and immune cells accumulation results in the lack of SCoRe, their morphology was shown as patches of intense reflective detritus. (D) Myelin debris reflectance in IR minus myelin debris reflectance in PPWM were calculated, demonstrating the dramatic reduction of myelin debris reflectance in the inflammatory lesion cords during the repair phase of EAE in the NgR(310)ecto-Fc HSCT mice.  $n = 1$  in empty vector HSCT EAE (1.5),  $n = 4$  in other analyzed groups. Data were represented as mean  $\pm$  SEM. Two-way ANOVA with Tukey post-hoc test.  $*P < 0.05$ . Individual data points represent the analysis of fluorescence intensity obtained from the longitudinal spinal cord sections of experimental mice.

**A**

CD11b macrophage lysates from spinal cords

Immunoprecrecipitation

Direct western blot - 5% input

Anti-Nogo66

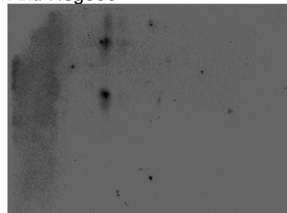

Anti-Nogo66

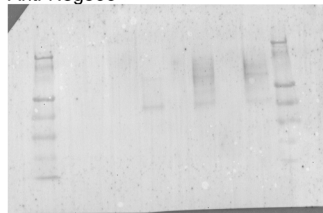

Anti-MAG

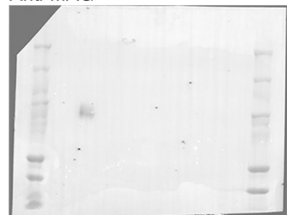

Anti-MAG

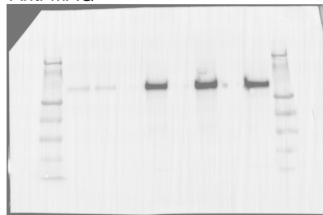

Anti-mNgR

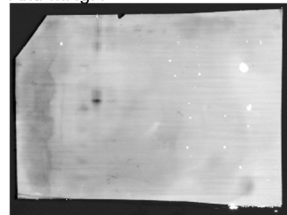

Anti-mNgR

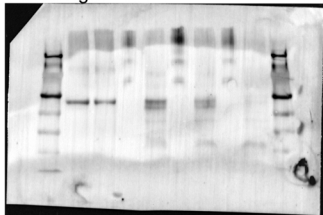

Anti-Fc

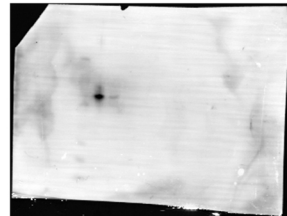Anti- $\alpha$ -Tubulin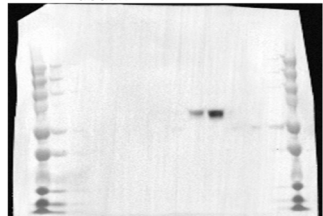**B**

Transfected HEK 293T cell lysates and conditioned media

Direct western blot - 5% input

Conditioned media

Cell lysates

Anti-NgR

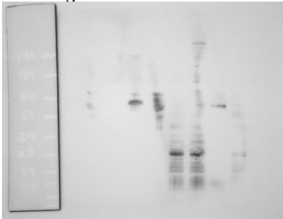

Anti-NgR

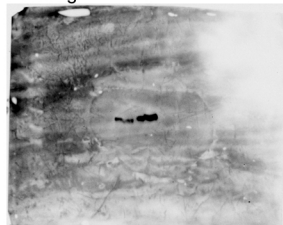

Anti-myc tag

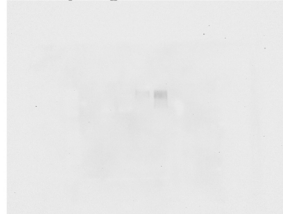

Anti-myc tag

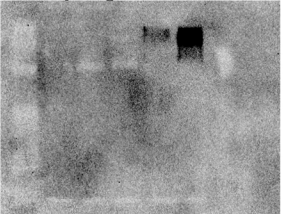

Anti-Fc

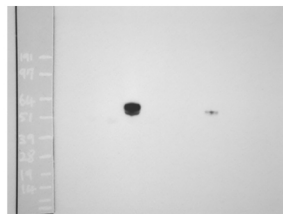

Anti-Fc

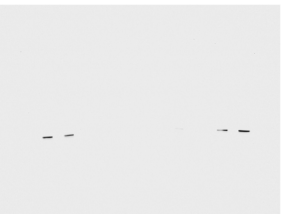

## **Supplementary Figure 9**

**Uncropped blot scans for the presented immunoprecipitation and western blots. (A)**

corresponds to Fig. 5B; **(B)** corresponds to Supplementary Figure 1B.
